# Supplementary material for: Bootstrap percolation on spatial networks
Source: PubMed Central journal article supplement (PMC4589777; doi:10.1038/srep14662), 2015-10-01
Supplement: srep14662-s1.pdf [file srep14662-s1.pdf]

# Bootstrap percolation on spatial networks

Jian Gao<sup>1</sup>, Tao Zhou<sup>1,2</sup> & Yanqing Hu<sup>3,4,\*</sup>

<sup>1</sup> CompleX Lab, Web Sciences Center, University of Electronic Science and Technology of China, Chengdu 611731, China.

<sup>2</sup> Big Data Research Center, University of Electronic Science and Technology of China, Chengdu 611731, China.

<sup>3</sup> School of Mathematics, Southwest Jiaotong University, Chengdu 610031, China.

<sup>4</sup> School of Information Science and Technology, Sun Yat-sen University, Guangzhou 510006, China.

\* E-mail: yanqing.hu.sc@gmail.com

## Supplementary Information

### 1. $S_{gc}$ for spatial networks

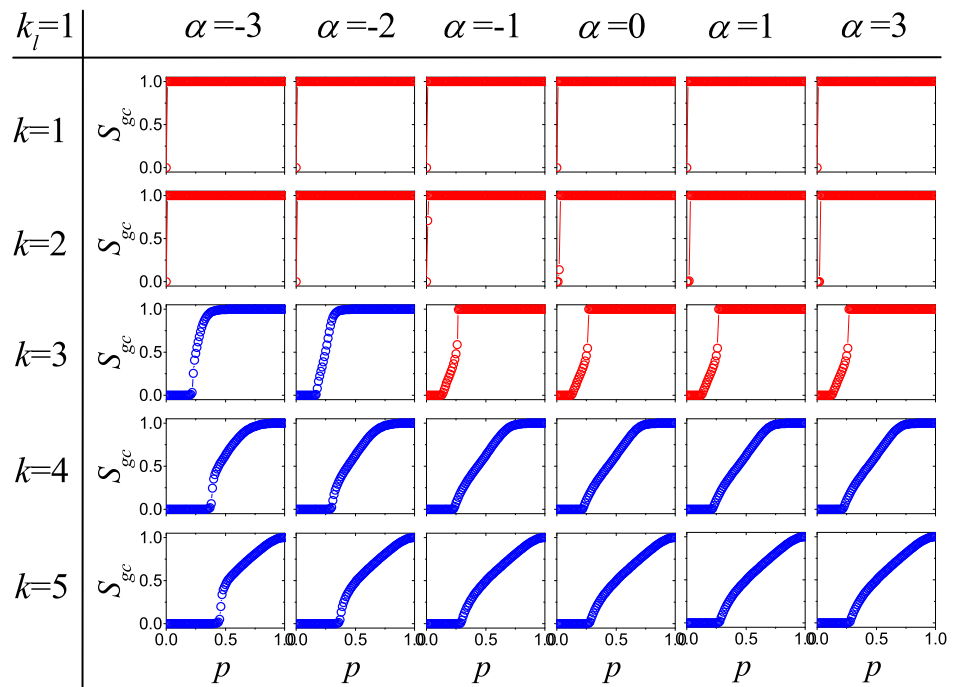

**Figure S1.**  $S_{gc}$  as a function of  $p$  after bootstrap percolation on undirected Kleinberg's spatial networks with  $k_l = 1$  in parameter spaces  $(k, \alpha)$ . Red and blue curves correspond to the presence of a double phase transition (or a first-order phase transition in the trivial cases where  $p_{c1} \approx 0$ ) and a second-order phase transition, respectively. Results are averaged over 1000 realizations with fixed network size  $L = 400$ .

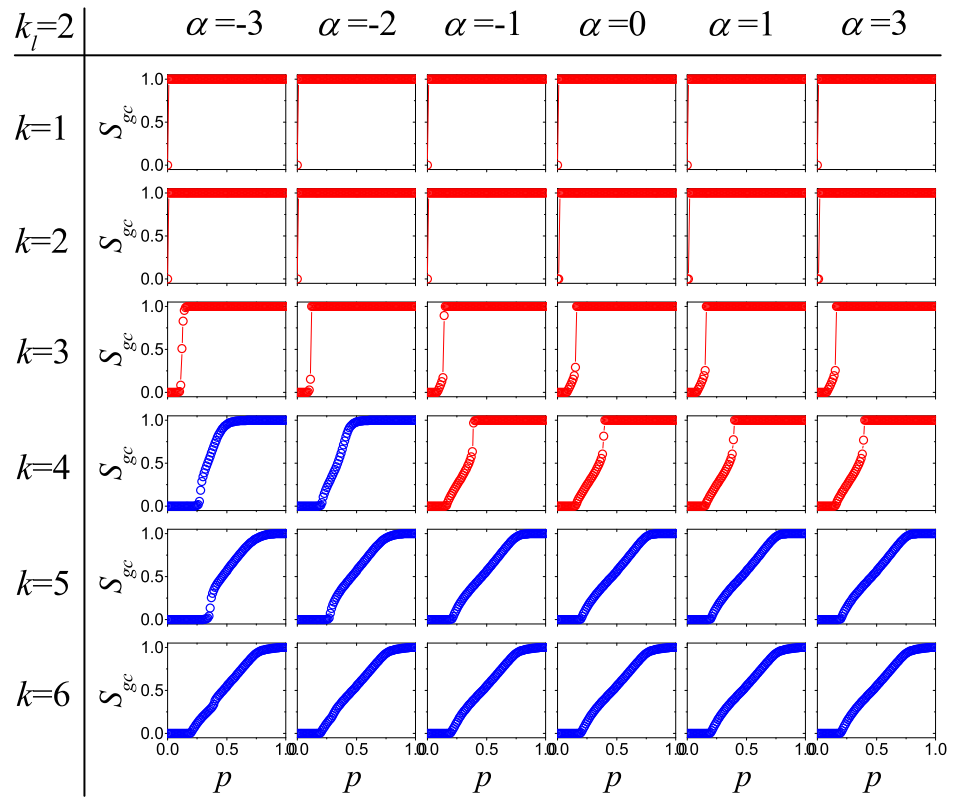

**Figure S2.**  $S_{gc}$  as a function of  $p$  after bootstrap percolation on undirected Kleinberg's spatial networks with  $k_l = 2$  in parameter spaces  $(k, \alpha)$ . Red and blue curves correspond to the presence of a double phase transition (or a first-order phase transition in the trivial cases where  $p_{c1} \approx 0$ ) and a second-order phase transition, respectively. Results are averaged over 1000 realizations with fixed network size  $L = 400$ .

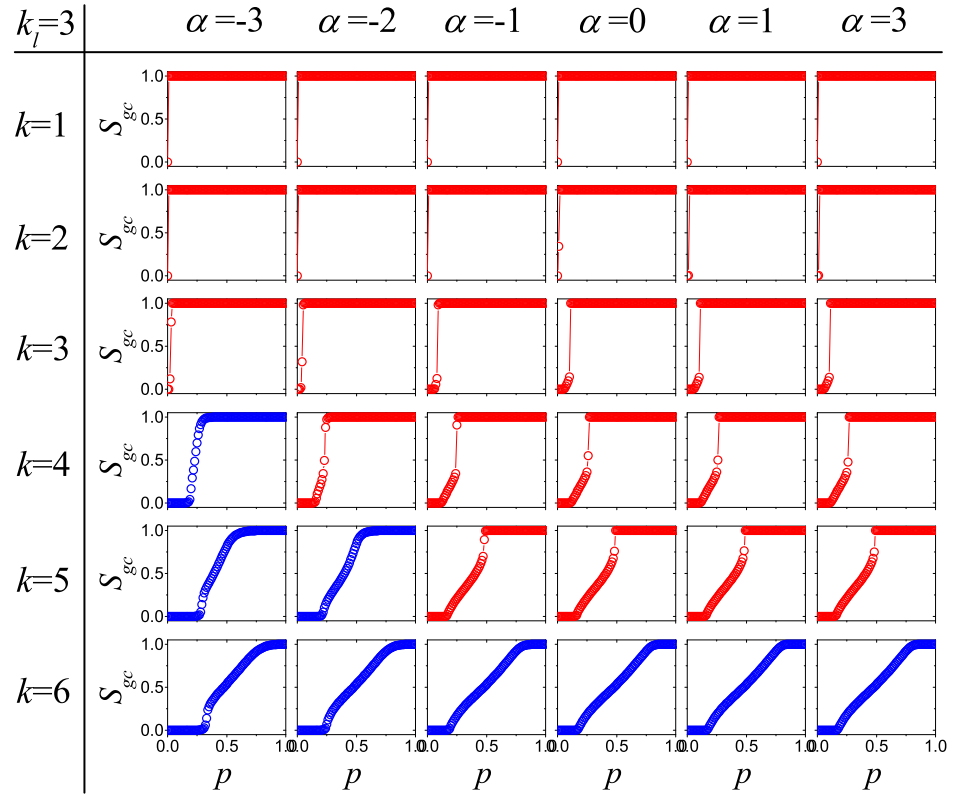

**Figure S3.**  $S_{gc}$  as a function of  $p$  after bootstrap percolation on undirected Kleinberg's spatial networks with  $k_l = 3$  in parameter spaces  $(k, \alpha)$ . Red and blue curves correspond to the presence of a double phase transition (or a first-order phase transition in the trivial cases where  $p_{c1} \approx 0$ ) and a second-order phase transition, respectively. Results are averaged over 1000 realizations with fixed network size  $L = 400$ .

## 2. $S_{gc}$ for directed Kleinberg's spatial networks

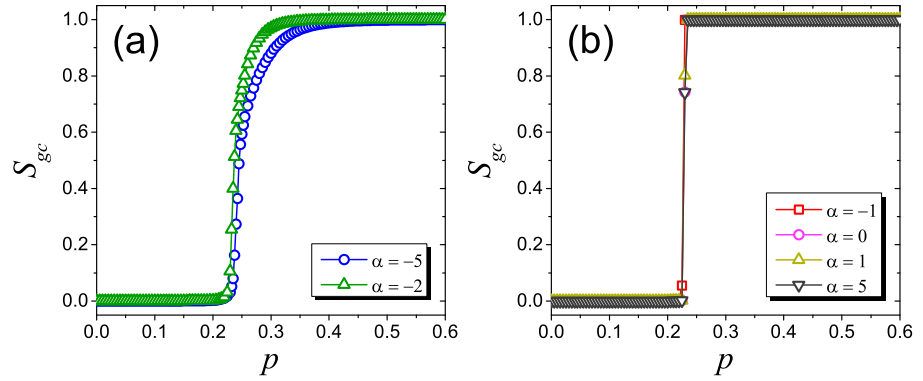

**Figure S4.**  $S_{gc}$  as a function of  $p$  after bootstrap percolation on directed Kleinberg's spatial networks in parameter spaces  $(k, k_l) = (3, 1)$ . Results are averaged over 1000 realizations with fixed network size  $L = 400$ .

## 3. Analysis on effects of boundary conditions

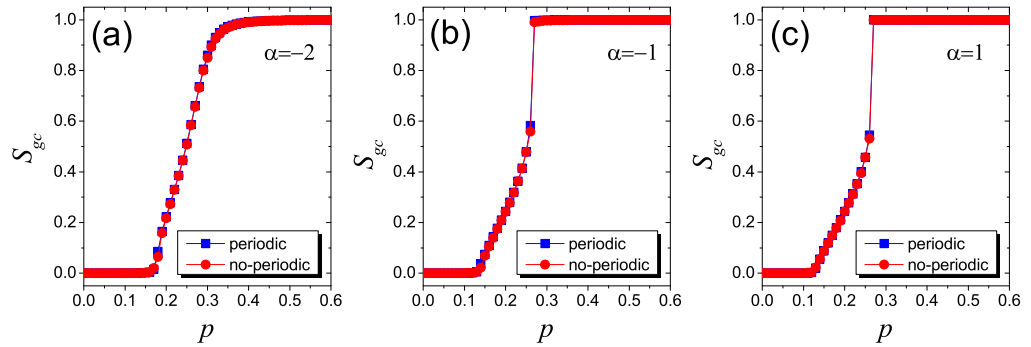

**Figure S5.**  $S_{gc}$  as a function of  $p$  after bootstrap percolation on undirected Kleinberg's spatial networks based on square lattice with or without periodic boundary conditions in parameter spaces  $(k, k_l) = (3, 1)$ . Results are averaged over 1000 realizations with fixed network size  $L = 400$ .

#### 4. Phase diagram for LR networks

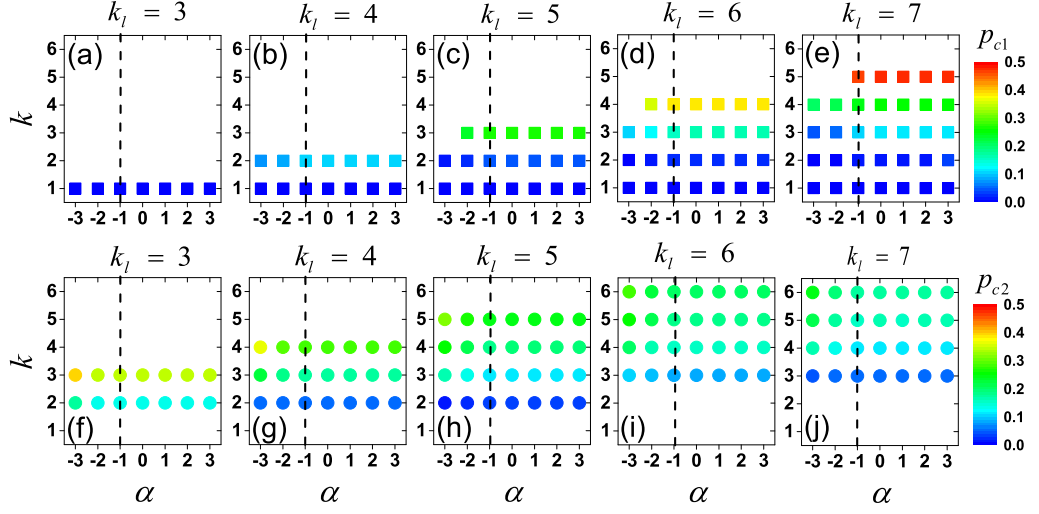

**Figure S6.** Phase diagram of bootstrap percolation on LR networks in parameter spaces  $(k, \alpha, k_l)$ . The color of data points in (a), (b), (c), (d) and (e) marks the value of  $p_{c1}$ , where there is a hybrid phase transition (or a first-order phase transition in the trivial cases where  $p_{c1} \approx 0$ ), and the color of data points in (f), (g), (h), (i) and (j) marks the value of  $p_{c2}$ , where the transition is of second-order. Blank areas stand for the absent of the corresponding phase transitions. Separated by the vertical dash line  $\alpha = -1$ , on the right side, the color of data points is nearly unchanged for the same parameter  $k$ , meaning that the values of  $p_{c1}$  and  $p_{c2}$  are almost invariant.  $\alpha_c \approx -1$  is found to be a robust critical value, above which the critical points for the double phase transition are almost constant. When  $\alpha < -1$ ,  $p_{c1}$  decreases and  $p_{c2}$  increases as  $\alpha$  decreases. Results are averaged over 1000 realizations with fixed network size  $L = 400$ .

## 5. $S_{gc}$ for LR networks

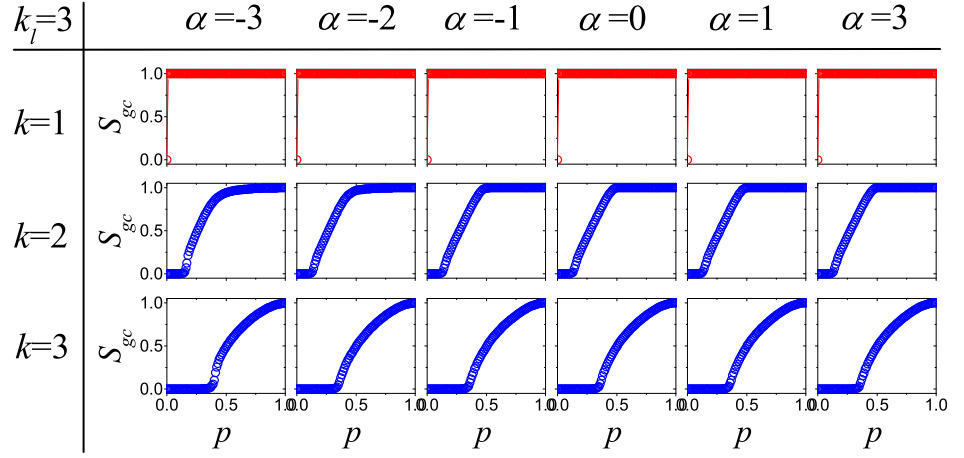

**Figure S7.**  $S_{gc}$  as a function of  $p$  after bootstrap percolation on LR networks with  $k_l = 3$  in parameter spaces  $(k, \alpha)$ . Red and blue curves correspond to the presence of a double phase transition (or a first-order phase transition in the trivial cases where  $p_{c1} \approx 0$ ) and a second-order phase, respectively. Results are averaged over 1000 realizations with fixed network size  $L = 400$ .

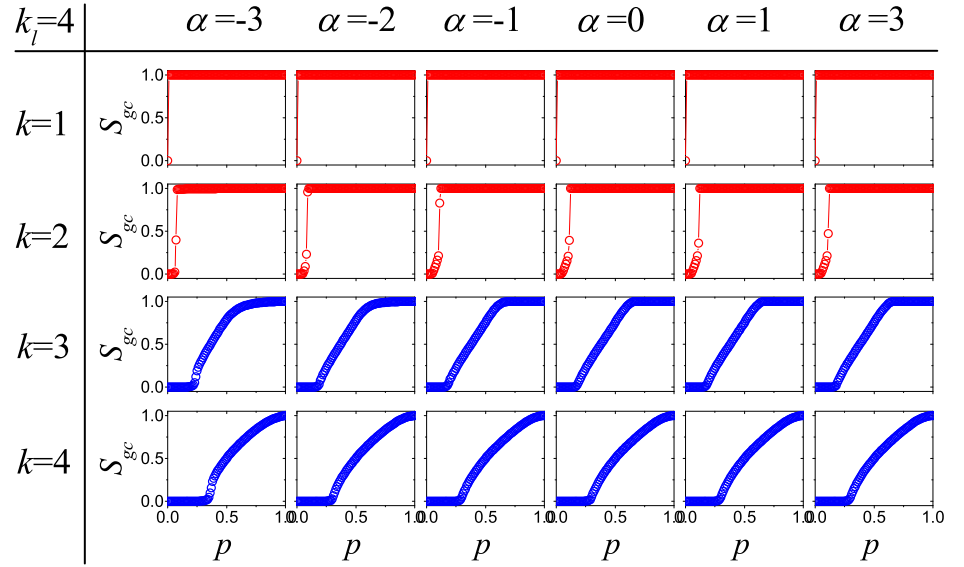

**Figure S8.**  $S_{gc}$  as a function of  $p$  after bootstrap percolation on LR networks with  $k_l = 4$  in parameter spaces  $(k, \alpha)$ . Red and blue curves correspond to the presence of a double phase transition (or a first-order phase transition in the trivial cases where  $p_{c1} \approx 0$ ) and a second-order phase, respectively. Results are averaged over 1000 realizations with fixed network size  $L = 400$ .

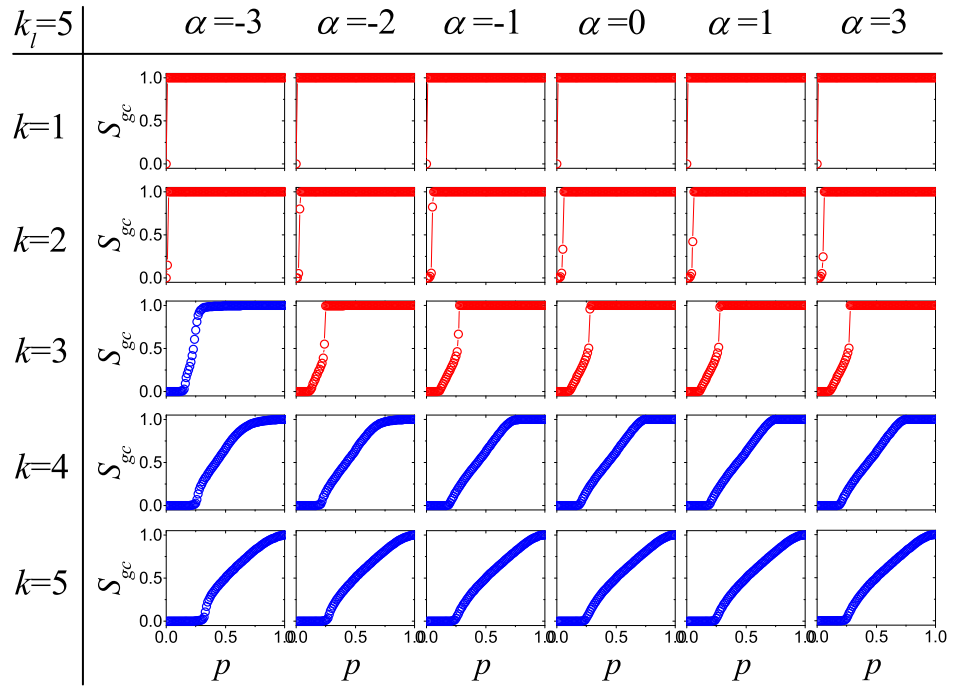

**Figure S9.**  $S_{gc}$  as a function of  $p$  after bootstrap percolation on LR networks with  $k_l = 5$  in parameter spaces  $(k, \alpha)$ . Red and blue curves correspond to the presence of a double phase transition (or a first-order phase transition in the trivial cases where  $p_{c1} \approx 0$ ) and a second-order phase, respectively. Results are averaged over 1000 realizations with fixed network size  $L = 400$ .

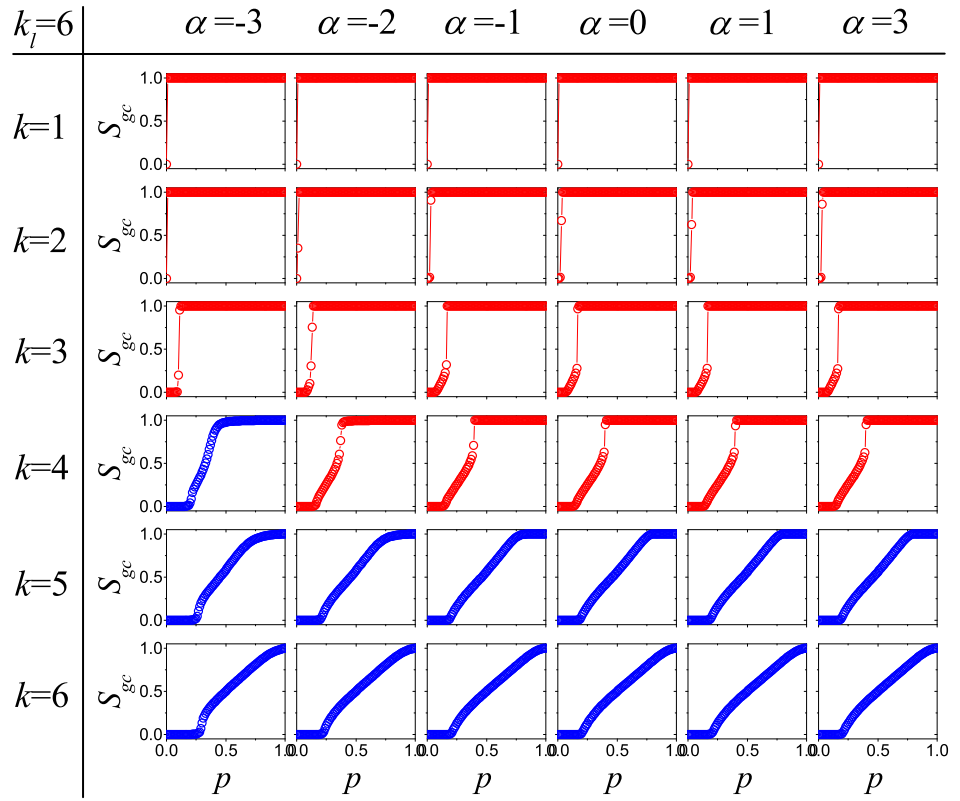

**Figure S10.**  $S_{gc}$  as a function of  $p$  after bootstrap percolation on LR networks with  $k_l = 6$  in parameter spaces  $(k, \alpha)$ . Red and blue curves correspond to the presence of a double phase transition (or a first-order phase transition in the trivial cases where  $p_{c1} \approx 0$ ) and a second-order phase, respectively. Results are averaged over 1000 realizations with fixed network size  $L = 400$ .



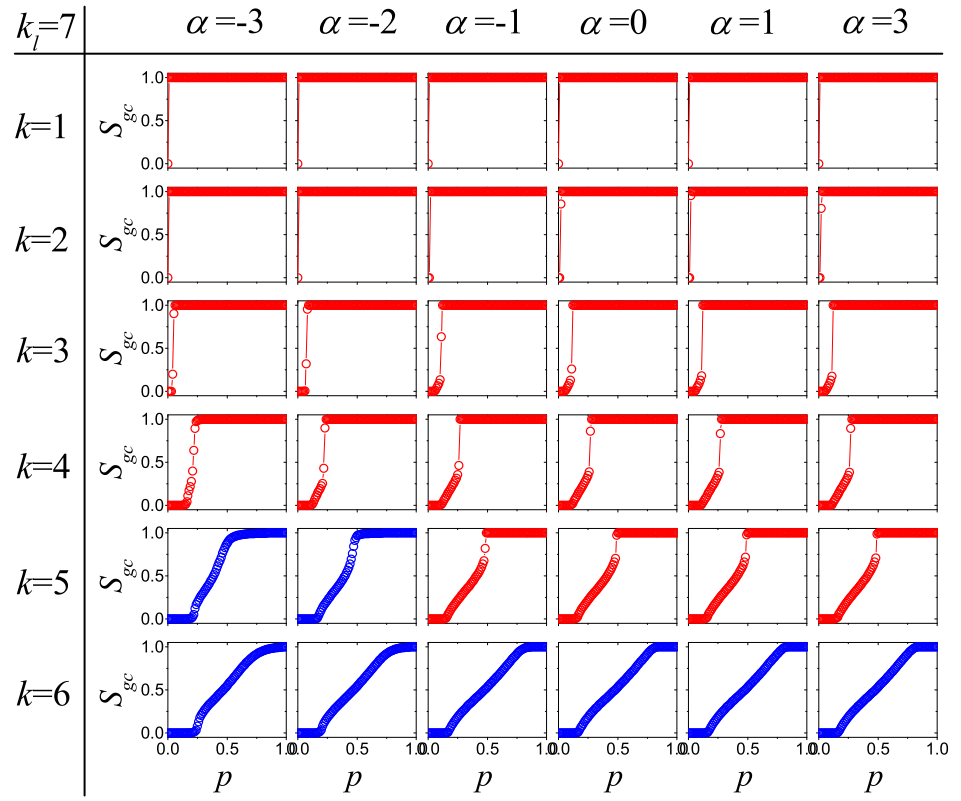

**Figure S11.**  $S_{gc}$  as a function of  $p$  after bootstrap percolation on LR networks with  $k_l = 7$  in parameter spaces  $(k, \alpha)$ . Red and blue curves correspond to the presence of a double phase transition (or a first-order phase transition in the trivial cases where  $p_{c1} \approx 0$ ) and a second-order phase, respectively. Results are averaged over 1000 realizations with fixed network size  $L = 400$ .
